# Supplementary material for: Objective identification of meteorological fronts and climatologies from ERA-Interim and ERA5
Source: Copernicus journal article supplement (doi:10.5194/gmd-17-6137-2024), 2024-08-19
Supplement: Supplementary file 1 [file gmd-17-6137-2024-supplement.pdf]

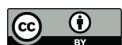

*Supplement of*

## **Objective identification of meteorological fronts and climatologies from ERA-Interim and ERA5**

**Philip G. Sansom and Jennifer L. Catto**

*Correspondence to:* Jennifer L. Catto ([j.catto@exeter.ac.uk](mailto:j.catto@exeter.ac.uk))

The copyright of individual parts of the supplement might differ from the article licence.

## 1 S1 Smoothing and threshold selection

2 Figure S1 compares the number of smoothing passes to the mean length of  
3 contours of  $\text{TFL} = \nabla^2 |\nabla \theta_W| = 0$  (Equation 1 in the main text) in terms  
4 of number of points located by the contouring algorithm. The mean length of  
5 contours increases rapidly at first before slowing to an approximately linear rate  
6 of increase above around eight smoothing passes. Eight smoothing passes does a  
7 good job of removing short circular contours and noise in longer contours. More  
8 than 10–12 smoothing passes and short or weak fronts that may be identified  
9 by a synoptic meteorologist may not be correctly identified.

10 Figure S2 compares thresholds of TFP for criterion  $K_1$  in the main text.  
11 Thresholds are defined in terms of percentiles of TFP in the Northern Hemi-  
12 sphere extra-tropics (23.4°N–66.6°N). In Figure S2, criterion  $K_1$  provides a very  
13 well defined filter for potential front locations. As the threshold is relaxed to  
14 higher quantiles, more objects are identified that would not be classified as  
15 fronts by an operational meteorologist. When the threshold is reduced below  
16 the 15th percentile, the front extending from the Mediterranean to the east and  
17 north of the Alps is almost eliminated, and the front across southern Sweden  
18 is also shortened. Both fronts appeared on Met Office charts of the time, thus  
19 thresholds below the 15th percentile would be too harsh, eliminating too many  
20 potential fronts. Meanwhile above the 25th percentile quantile the number of  
21 spurious potential fronts increases rapidly.

22 Figure S3 compares thresholds of  $|\nabla \theta_W|_{ABZ}$  for criterion  $K_2$  in the main  
23 text. Thresholds are defined in terms of quantiles  $|\nabla \theta_W|_{ABZ}$  in the North-  
24 ern Hemisphere extra-tropics (23.4°N–66.6°N). As the threshold is increased to  
25 higher quantiles, fewer fronts are identified until at the 60th percentile the front  
26 extending from the Mediterranean to the east and north of the Alps is split  
27 in two. Therefore, thresholds above the 55th percentile would be too harsh,  
28 eliminating too many potential fronts. Meanwhile, below the 50th percentile,  
29 the number of spurious potential fronts starts to increase.

30 Figure S4 compares thresholds of both TFP and  $|\nabla \theta_W|_{ABZ}$  for criteria  $K_1$   
31 and  $K_2$  combined. The 50th percentile of  $|\nabla \theta_W|_{ABZ}$  clearly helps to eliminate a  
32 number of spurious potential fronts compared to the 40th percentile. Therefore  
33 the 50th quantile was chosen as the threshold for criterion  $K_2$ . In contrast, the  
34 fronts identified are relatively insensitive to the choice of criterion  $K_1$  within  
35 the range of the 15th to 25th quantiles of TFP. However, in other examples, the  
36 15th and 20th percentiles were found to break, shorten or eliminate some fronts  
37 identified on charts. The 25th percentile was found to be more suitable overall  
38 and chosen as the threshold for criterion  $K_2$ .

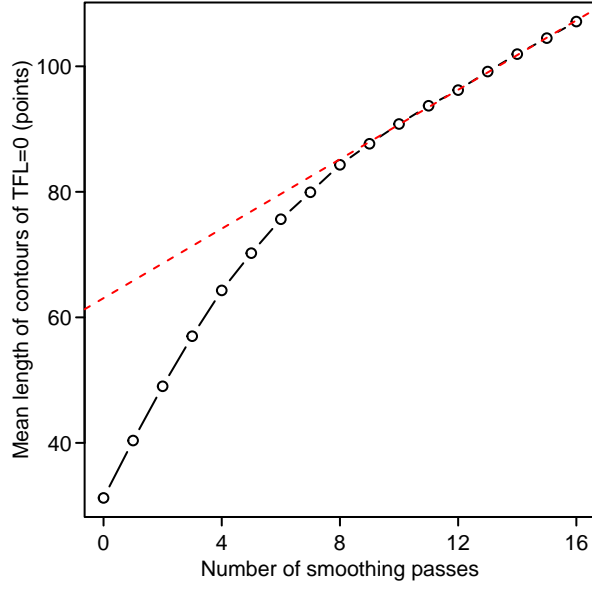

Figure S1: Comparison number of smoothing passes versus mean length of contours of  $TFL = \nabla^2 |\nabla \theta_W| = 0$  in terms of number of points located by the contouring algorithm during January 2000. Dashed red line shows the linear least squares fit to the mean number of points for  $n > 8$  smoothing passes.

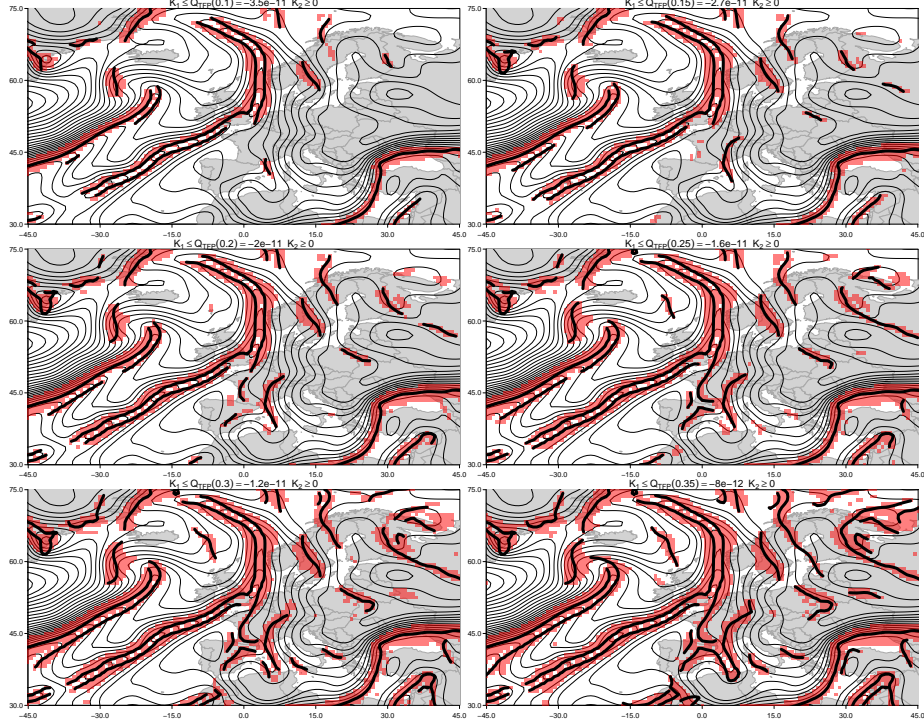

Figure S2: Comparison of thresholds of TFP for criterion  $K_1$  in ERA-Interim at 00:00 on 2001-01-01 with  $n = 8$  smoothing cycles. Threshold  $K_2$  is fixed at  $|\nabla\theta_W|_{ABZ} > 0 \text{ K m}^{-1}$  and thus provides no constraint on fronts identified.  $Q_{TFP}(p)$  indicate the  $p$ th percentile of TFP in the Northern Hemisphere extratropics ( $23.4^\circ\text{N}$ – $66.6^\circ\text{N}$ ). Red shading indicates the areas identified by criterion  $K_1$ . Thin black lines indicate contours of wet-bulb potential temperature  $\theta_W$ . Thick black lines indicates fronts identified according to the stated thresholds. The middle right panel shows the selected threshold.

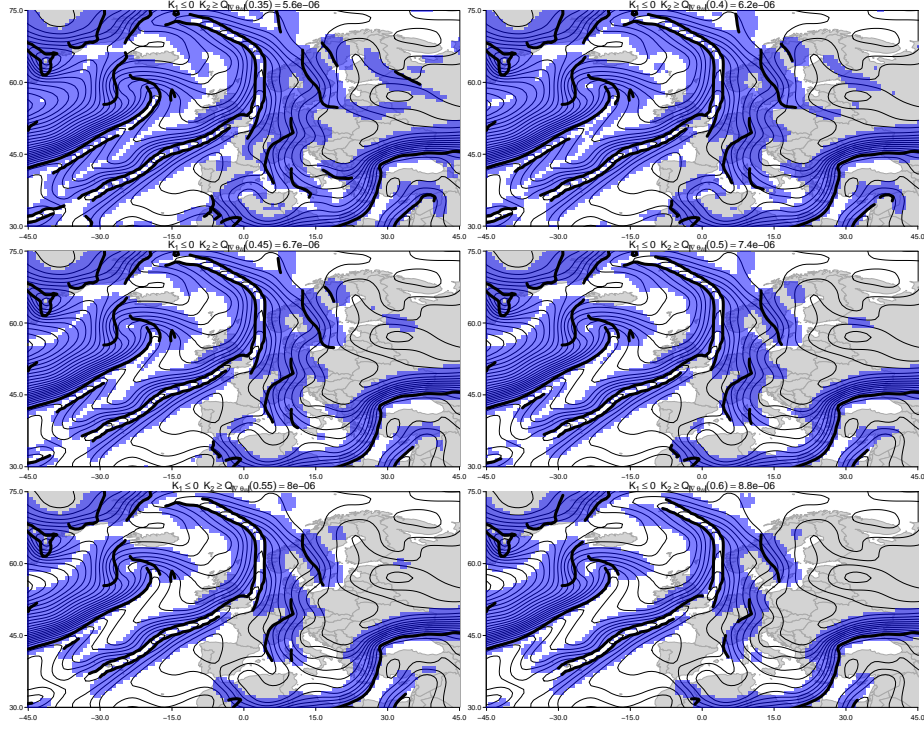

Figure S3: Comparison of thresholds of  $|\nabla\theta_W|_{ABZ}$  for criterion  $K_2$  in ERA-Interim at 00:00 on 2001-01-01 with  $n = 8$  smoothing cycles. Threshold  $K_1$  is fixed at  $\text{TFP} < 0 \text{ K m}^{-2}$  and thus provides the least possible constraint on fronts identified.  $Q_{|\nabla\theta_W|}(p)$  indicate the  $p$ th percentile of  $|\nabla\theta_W|_{ABZ}$  in the Northern Hemisphere extra-tropics ( $23.4^\circ\text{N}$ – $66.6^\circ\text{N}$ ). Blue shading indicates the areas identified by criterion  $K_2$ . Thin black lines indicate contours of wet-bulb potential temperature  $\theta_W$ . Thick black lines indicates fronts identified according to the stated thresholds. The middle right panel shows the selected threshold.

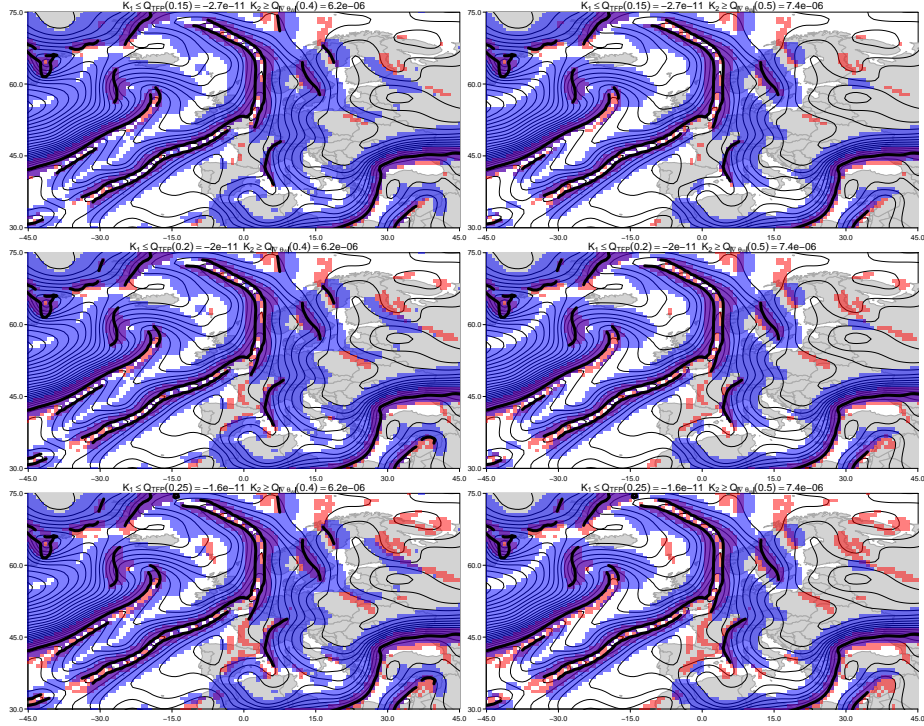

Figure S4: Comparison of thresholds of for criteria  $K_1$  and  $K_2$  in ERA-Interim at 00:00 on 2001-01-01 with  $n = 8$  smoothing cycles. Different thresholds for criterion  $K_1$  are compared (top)  $K_1 > Q_{TFP}(0.15)$ , (middle)  $K_1 > Q_{TFP}(0.20)$ , and (bottom)  $K_2 > Q_{TFP}(0.25)$ . Different thresholds for criterion  $K_2$  are compared (left)  $K_2 > Q_{|\nabla \theta_W|}(0.4)$ , and (right)  $K_2 > Q_{|\nabla \theta_W|}(0.5)$ . Purple shading indicates the areas where criteria  $K_1$  and  $K_2$  overlap. Thin black lines indicate contours of wet-bulb potential temperature  $\theta_W$ . Thick black lines indicates fronts identified according to the stated thresholds. The bottom right panel shows the final selected thresholds.
